# Supplementary material for: The value of genotypic and imaging information to predict functional and structural outcomes in ADPKD
Source: JCI journal article supplement (doi:10.1172/jci.insight.138724), 2020-07-07
Supplement: sd2 [file 2]

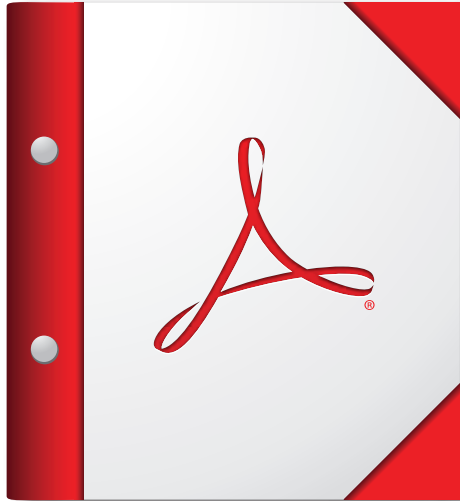

**For the best experience, open this PDF portfolio in  
Acrobat X or Adobe Reader X, or later.**

[Get Adobe Reader Now!](#)
